# Supplementary material for: Phase-engineered cathode for super-stable potassium storage
Source: PubMed Central journal article supplement (PMC9902589; doi:10.1038/s41467-023-36385-4), 2023-02-06
Supplement: 41467_2023_36385_MOESM1_ESM.pdf [file 41467_2023_36385_MOESM1_ESM.pdf]

## Supplementary information for

### **Phase-engineered cathode for super-stable potassium storage**

Lichen Wu<sup>1,2</sup>, Hongwei Fu<sup>1,2</sup>, Shu Li<sup>1,2</sup>, Jian Zhu<sup>3\*</sup>, Jiang Zhou<sup>4</sup>, Apparao M. Rao<sup>5</sup>,  
Limei Cha<sup>6,7,8\*</sup>, Kunkun Guo<sup>9</sup>, Shuangchun Wen<sup>1</sup>, Bingan Lu<sup>1,2\*</sup>

<sup>1</sup> School of Physics and Electronics, Hunan University, Changsha 410082, P. R. China.

<sup>2</sup> State Key Laboratory of Advanced Design and Manufacturing for Vehicle Body, Hunan University, Changsha 410082, P. R. China.

<sup>3</sup> College of Chemistry and Chemical Engineering, Hunan University, Changsha 410082, P. R. China.

<sup>4</sup> School of Materials Science and Engineering, Central South University, Changsha 410083, P. R. China.

<sup>5</sup> Department of Physics and Astronomy, Clemson Nanomaterials Institute, Clemson University, SC 29634, USA.

<sup>6</sup> Materials Science and Engineering program, Guangdong Technion–Israel Institute of Technology, Shantou 515063, P. R. China.

<sup>7</sup> Materials Science and Engineering program, Technion–Israel Institute of Technology, Haifa 32000, Israel.

<sup>8</sup> MATEC key lab, Guangdong Technion–Israel Institute of Technology, Shantou 515063, P. R. China.

<sup>9</sup> College of Materials Science and Engineering, Hunan University, Changsha 410082, P. R. China.

\*Corresponding author. E-mail: jzhu@hnu.edu.cn(J.Z.); cha.limei@gtiit.edu.cn

(L.C.); luba2012@hnu.edu.cn (B.L.)

**This file includes:**

Supplementary Figures 1 to 23

Supplementary Tables 1 to 3

Supplementary References

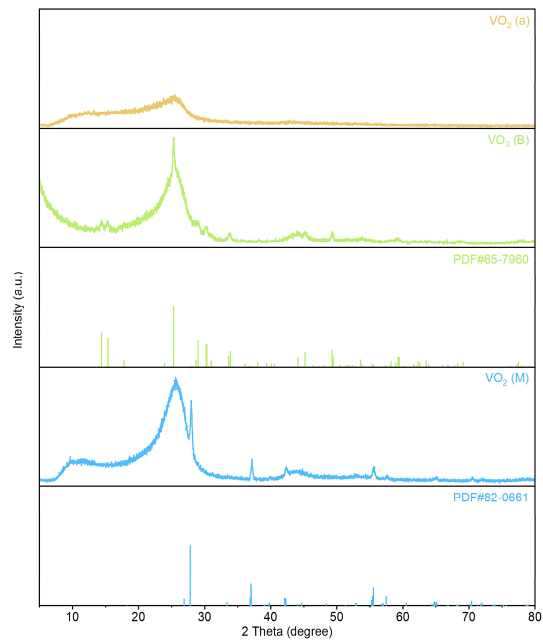

**Supplementary Figure 1. XRD patterns and the corresponding JCPDS data of VO<sub>2</sub> (a), VO<sub>2</sub> (B), and VO<sub>2</sub> (M).**

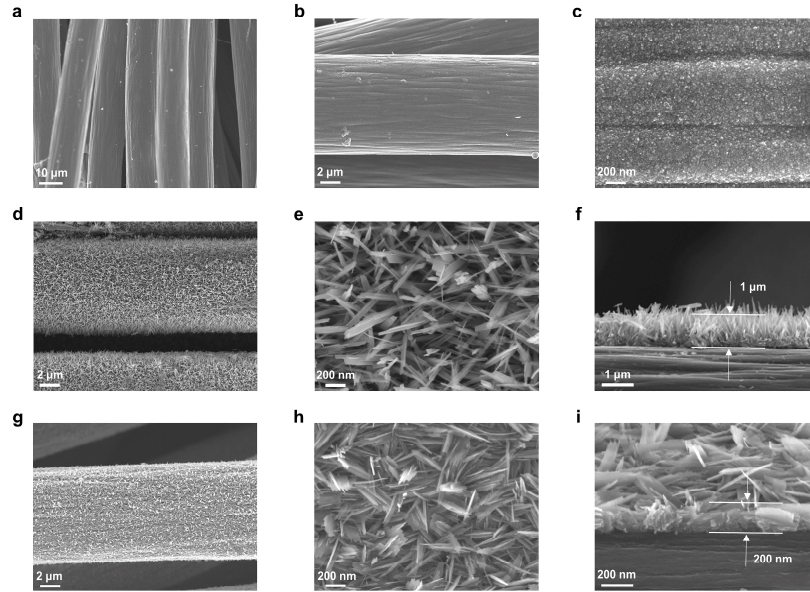

**Supplementary Figure 2. FE-SEM images for the several types of VO<sub>2</sub> on the carbon fiber cloth.** Low-magnification FE-SEM images of a), b) VO<sub>2</sub> (a), d) VO<sub>2</sub> (B), and g) VO<sub>2</sub> (M). High-magnification FE-SEM images of c) VO<sub>2</sub> (a), e) VO<sub>2</sub> (B), and h) VO<sub>2</sub> (M). Cross-sectional FE-SEM images of f) VO<sub>2</sub> (B) and i) VO<sub>2</sub> (M).



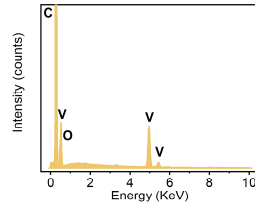

**Supplementary Figure 3. EDS results of VO<sub>2</sub> (a).**

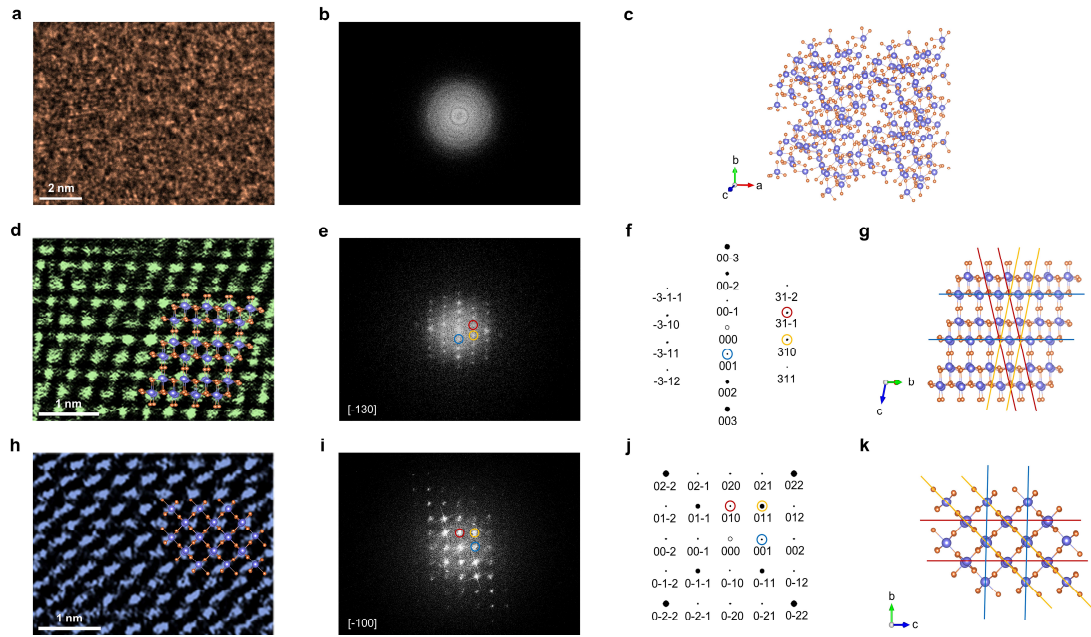

**Supplementary Figure 4. Morphology and structural characterization of the pristine materials.** The HRTEM images at atomic resolution of pristine a)  $\text{VO}_2$  (a), d)  $\text{VO}_2$  (B), and h)  $\text{VO}_2$  (M). Their corresponding FFT patterns are shown in b), e), and i), respectively. Schematic illustrations of c)  $\text{VO}_2$  (a), g)  $\text{VO}_2$  (B), and k)  $\text{VO}_2$  (M). The simulated diffraction patterns of f)  $\text{VO}_2$  (B) and j)  $\text{VO}_2$  (M).

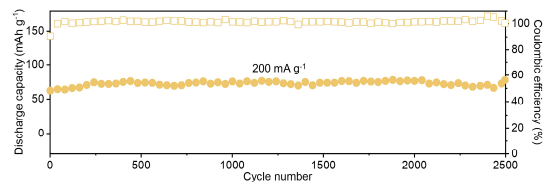

**Supplementary Figure 5. Cycle life performance of VO<sub>2</sub>(a) at 200 mA g<sup>-1</sup>.**

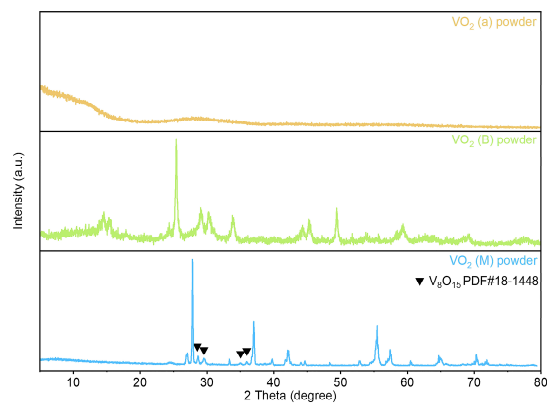

**Supplementary Figure 6.** XRD patterns of VO<sub>2</sub> (a) powder, VO<sub>2</sub> (B) powder, and VO<sub>2</sub> (M) powder.

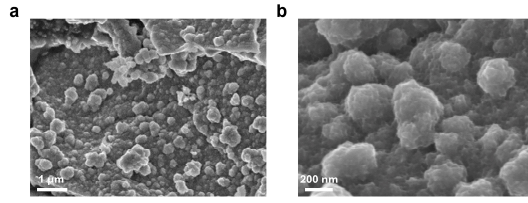

**Supplementary Figure 7. Material characterizations of amorphous VO<sub>2</sub> powders.**

a) and b) The FE-SEM images of amorphous VO<sub>2</sub> powder.

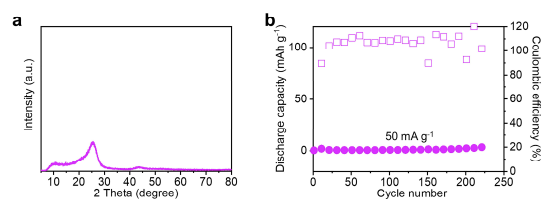

**Supplementary Figure 8. Material characterization and electrochemical performance of pure CF.** a) XRD pattern and b) cycle performance at 50 mA g<sup>-1</sup> for pure CF.

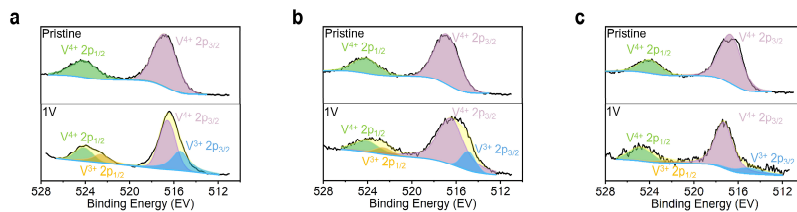

**Supplementary Figure 9. XPS spectra of V 2p of a) VO<sub>2</sub> (a), b) VO<sub>2</sub> (B) and c) VO<sub>2</sub> (M) at pristine state and discharged state of 1 V.**

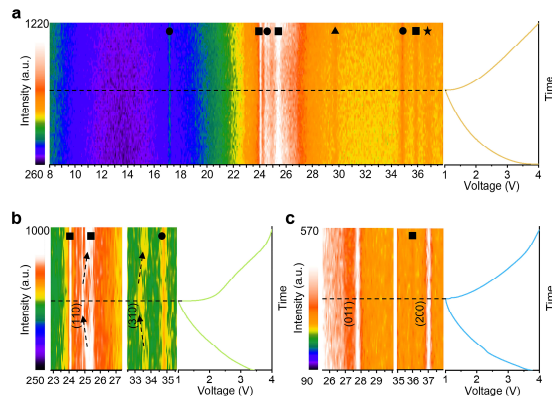

**Supplementary Figure 10. In situ XRD patterns of a) VO<sub>2</sub> (a), b) VO<sub>2</sub> (B), and c) VO<sub>2</sub> (M) half cells during a cycle and the corresponding galvanostatic curves. The peak positions marked by the following symbols are due to the Be disk: ▲: Be<sub>11</sub>Fe; ●: Be<sub>12</sub>Cr; ■: Be<sub>2</sub>Cr; ★: BeS.**



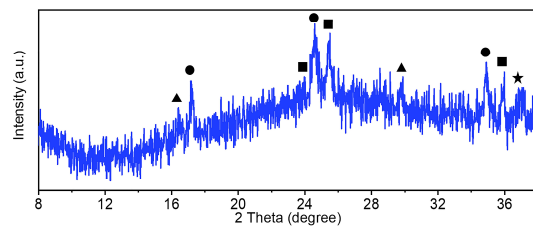

**Supplementary Figure 11. *In situ* XRD test with a blank sample.** The peaks labeled with different symbols on the peaks correspond to: ▲: Be<sub>11</sub>Fe; ●: Be<sub>12</sub>Cr; ■: Be<sub>2</sub>Cr; ★: BeS.

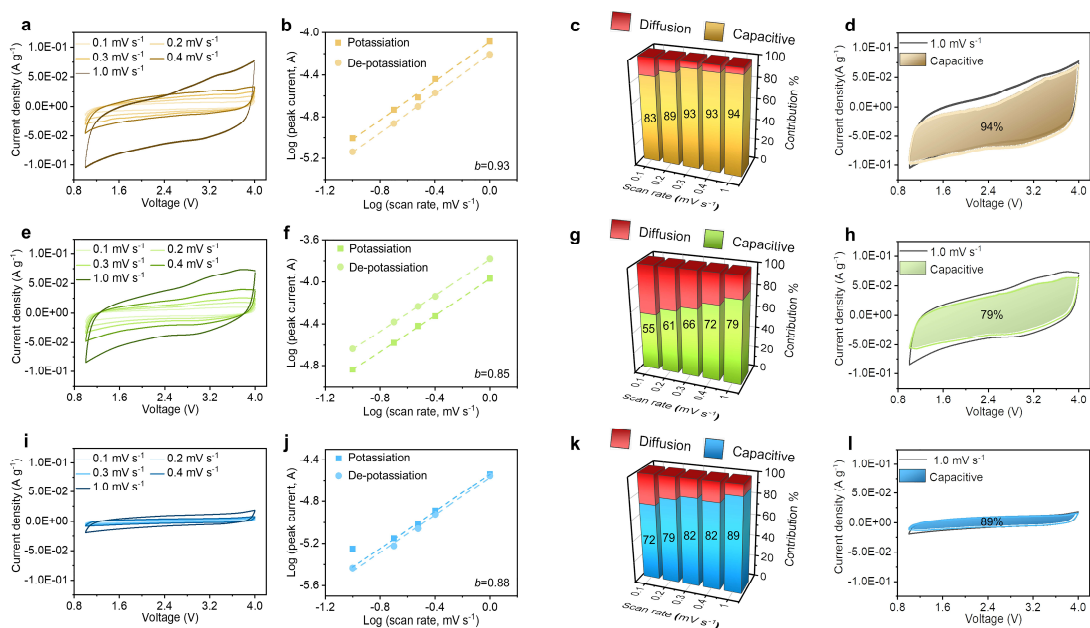

**Supplementary Figure 12. The electrokinetic analyses conducted by CV test.** a), e), and i) CV curves for VO<sub>2</sub> (a), VO<sub>2</sub> (B), and VO<sub>2</sub> (M) at different scan rates. b), f) and j) Relationship between the logarithmic scan rates and logarithmic peak currents. c), g) and k) Contribution of pseudocapacitive capacities for K<sup>+</sup> storage at different scan rates. d), h), and l) The capacitive fractions at a scan rate of 1.0 mV s<sup>-1</sup> for VO<sub>2</sub> (a), VO<sub>2</sub> (B), and VO<sub>2</sub> (M), respectively.

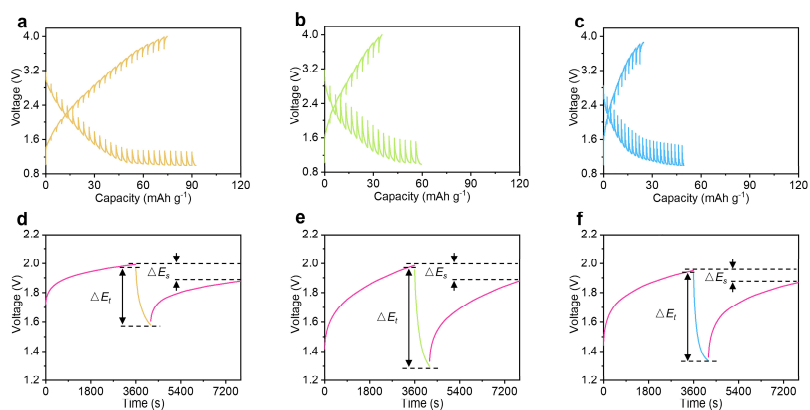

**Supplementary Figure 13. Investigation of the  $K^+$  ions migration kinetics by GITT.**

Transient voltage profiles versus specific capacity for potassiation/de-potassiation in a)  $VO_2$  (a), b)  $VO_2$  (B), and c)  $VO_2$  (M) obtained from GITT. A single step of GITT for d)  $VO_2$  (a), e)  $VO_2$  (B), and f)  $VO_2$  (M) during the initial discharge process.

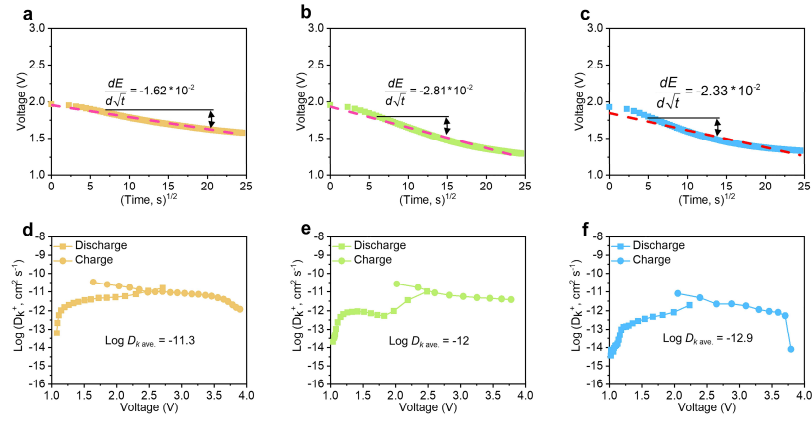

**Supplementary Figure 14. The chemical diffusion coefficient  $D_K$  calculated by GITT.** The representation transient voltage of a galvanostatic pulse as a function of the square root of time from GITT for a) VO<sub>2</sub> (a), b) VO<sub>2</sub> (B), and c) VO<sub>2</sub> (M). The calculated chemical diffusion coefficient  $D_K$  versus voltage for d) VO<sub>2</sub> (a), e) VO<sub>2</sub> (B), and f) VO<sub>2</sub> (M), respectively.

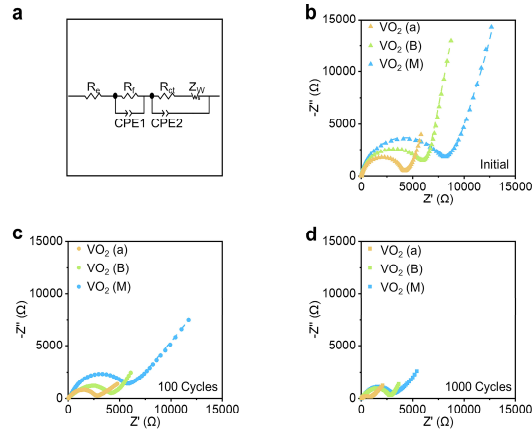

**Supplementary Figure 15. The electrochemical impedance spectroscopy.** a) An equivalent circuit model for the impedance spectra. Nyquist plots for  $\text{VO}_2$  in different phases at b) open-circuit voltage states, c) charged states after 100 cycles, and d) charged states after 1000 cycles.

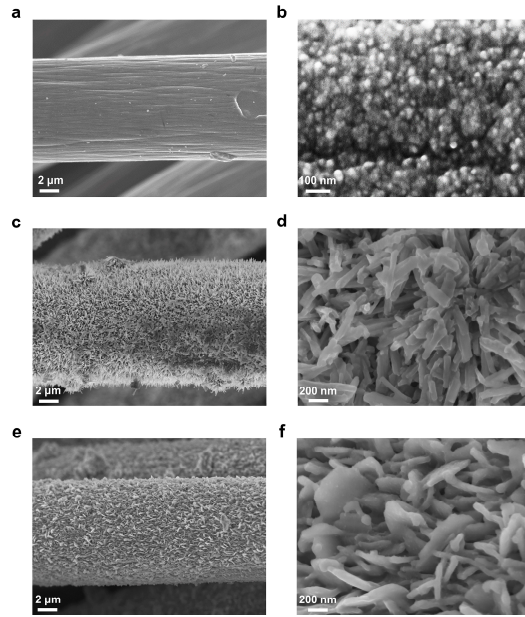

**Supplementary Figure 16. The FE-SEM images after cycling.** FE-SEM of a), b) VO<sub>2</sub> (a), c), d) VO<sub>2</sub> (B), and e), f) VO<sub>2</sub> (M) after 100 cycles at charged states.

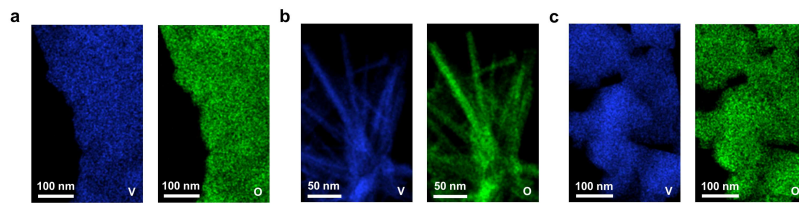

**Supplementary Figure 17. Elemental mappings of V and O for a) VO<sub>2</sub> (a), b) VO<sub>2</sub> (B), and c) VO<sub>2</sub> (M).**

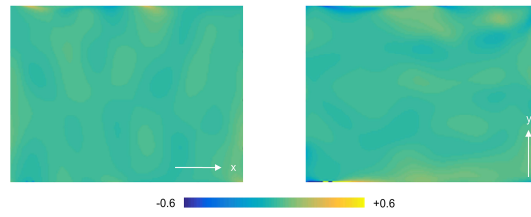

**Supplementary Figure 18. Strain mapping with uniaxial strain components  $\epsilon_{xx}$  (left) and  $\epsilon_{yy}$  (right), as obtained by GPA of the HRTEM image for pristine VO<sub>2</sub> (B).**



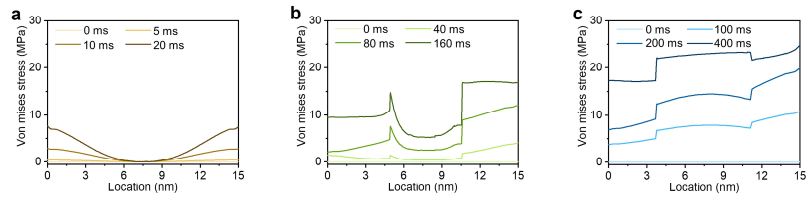

**Supplementary Figure 19. Von Mises stress within the a) VO<sub>2</sub> (a), b) VO<sub>2</sub> (B), and c) VO<sub>2</sub> (M) particles at different times along the radial direction.**

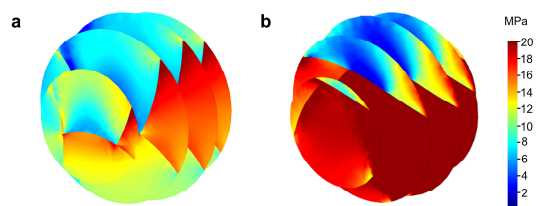

**Supplementary Figure 20. 3D view of equivalent stress after K<sup>+</sup> ions diffusion in a) VO<sub>2</sub> (B) particle for 160 ms, and b) VO<sub>2</sub> (M) particle for 400 ms, respectively.**

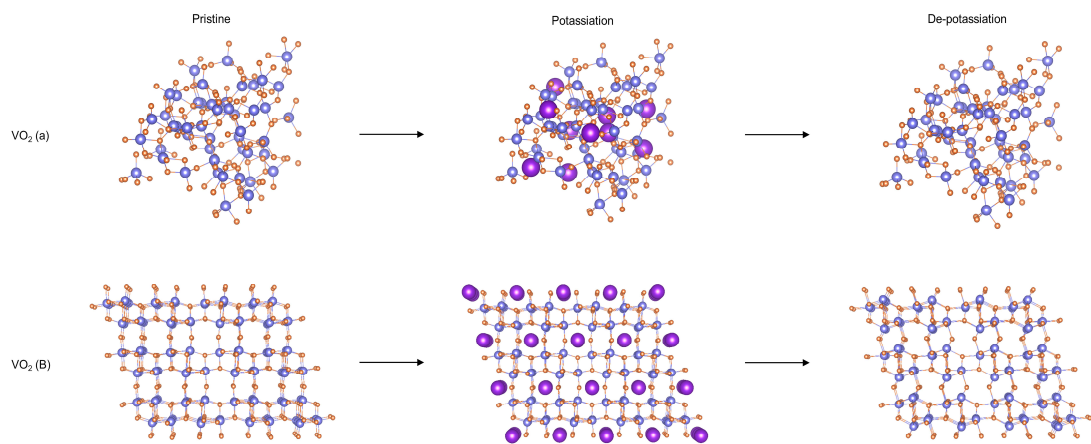

**Supplementary Figure 21. The schematic structural changes for VO<sub>2</sub> (a) and VO<sub>2</sub> (B) during the potassiation and depotassiation.**

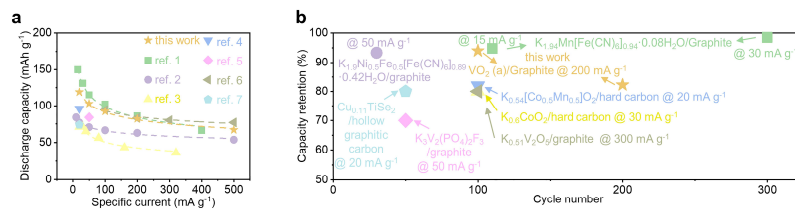

**Supplementary Figure 22. Comparison of full battery a) rate capability and b) cycling performance of  $\text{VO}_2$  (a) as the cathode with the reported systems<sup>1-7</sup>.**

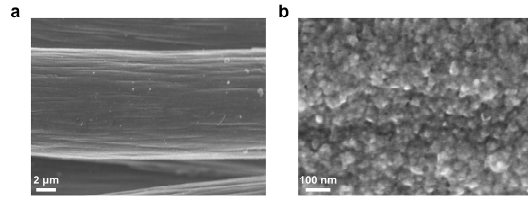

**Supplementary Figure 23. The FE-SEM images of VO<sub>2</sub> (a) after bending 1000 times at charged states.**

**Supplementary Table 1. The atomic ratio of elements from EDS.**

| Element | Wt %  | Atomic % |
|---------|-------|----------|
| C       | 76.09 | 87.92    |
| O       | 9.37  | 8.12     |
| V       | 14.54 | 3.96     |

**Supplementary Table 2. The fitting results of EIS for VO<sub>2</sub> in different phases.**

| Sample              | Item                | Initial | 100 cycles | 1000 cycles |
|---------------------|---------------------|---------|------------|-------------|
| VO <sub>2</sub> (a) | R <sub>e</sub> (Ω)  | 6.319   | 15.74      | 22.93       |
|                     | R <sub>f</sub> (Ω)  | 1.45    | 127.5      | 93          |
|                     | R <sub>ct</sub> (Ω) | 3904    | 2414       | 756.7       |
| VO <sub>2</sub> (B) | R <sub>e</sub> (Ω)  | 6.08    | 7.123      | 8.144       |
|                     | R <sub>f</sub> (Ω)  | 2.407   | 754.8      | 470.4       |
|                     | R <sub>ct</sub> (Ω) | 5421    | 3462       | 2315        |
| VO <sub>2</sub> (M) | R <sub>e</sub> (Ω)  | 8.008   | 10.13      | 9.684       |
|                     | R <sub>f</sub> (Ω)  | 1.258   | 1245       | 483.8       |
|                     | R <sub>ct</sub> (Ω) | 8345    | 4418       | 2534        |

**Supplementary Table 3. The density test results for amorphous VO<sub>2</sub> powders.**

| Sample | Volume (cm <sup>3</sup> ) | Density (g cm <sup>-3</sup> ) | Elapsed Time (mm:ss) | Temperature (°C) |
|--------|---------------------------|-------------------------------|----------------------|------------------|
| 1      | 0.1802                    | 2.8075                        | 11:13                | 31.14            |
| 2      | 0.1800                    | 2.8100                        | 13:46                | 31.18            |
| 3      | 0.1797                    | 2.8141                        | 16:15                | 31.24            |
| 4      | 0.1804                    | 2.8031                        | 18:49                | 31.29            |
| 5      | 0.1809                    | 2.7961                        | 21:22                | 31.29            |

### Supplementary References

- 1 Deng, L. *et al.* Defect-free potassium manganese hexacyanoferrate cathode material for high-performance potassium-ion batteries. *Nat. Commun.* **12**, 2167 (2021).
- 2 Chong, S. *et al.* Potassium nickel iron hexacyanoferrate as ultra-long-life cathode material for potassium-ion batteries with high energy density. *ACS Nano* **14**, 9807-9818 (2020).
- 3 Deng, T. *et al.* Self-templated formation of P2-type K<sub>0.6</sub>CoO<sub>2</sub> microspheres for high reversible potassium-ion batteries. *Nano Lett.* **18**, 1522-1529 (2018).
- 4 Choi, J. U. *et al.* K<sub>0.54</sub>[Co<sub>0.5</sub>Mn<sub>0.5</sub>]O<sub>2</sub>: New cathode with high power capability for potassium-ion batteries. *Nano Energy* **61**, 284-294 (2019).
- 5 Lin, X., Huang, J., Tan, H., Huang, J. & Zhang, B. K<sub>3</sub>V<sub>2</sub>(PO<sub>4</sub>)<sub>2</sub>F<sub>3</sub> as a robust cathode for potassium-ion batteries. *Energy Storage Mater.* **16**, 97-101 (2019).
- 6 Zhu, Y.-H. *et al.* Reconstructed orthorhombic V<sub>2</sub>O<sub>5</sub> polyhedra for fast ion diffusion in K-ion batteries. *Chem* **5**, 168-179 (2019).
- 7 Wu, L. *et al.* Layered superconductor Cu<sub>0.11</sub>TiSe<sub>2</sub> as a high-stable K-cathode. *Adv. Funct. Mater.*, 2109893 (2021).
